# Supplementary material
Source: publisher figshare collection journal article supplement (https://tandf.figshare.com/articles/dataset/_/25889016)
Supplement: Supplementary file 1 [file 46505493]

# Promising links: How parties combine policy issues with group appeals

Lena Maria Huber <sup>\*1</sup>, Martin Haselmayer <sup>\*\*</sup>

<sup>\*</sup>MZES, University of Mannheim, <sup>\*\*</sup>University of Vienna

## Online Appendix

---

<sup>1</sup>**Corresponding Author:**

Lena Maria Huber  
Mannheim Centre for European Social Research,  
University of Mannheim,  
A5, 6 Building A  
68159 Mannheim, Germany  
lena.huber@uni-mannheim.de

## Contents

|                                                                    |           |
|--------------------------------------------------------------------|-----------|
| <b>A Coding approach for group appeals</b>                         | <b>3</b>  |
| A.1 Definition of group appeals . . . . .                          | 3         |
| A.2 Assignment of group appeals to individual statements . . . . . | 3         |
| A.3 Special coding rules . . . . .                                 | 4         |
| A.4 Examples . . . . .                                             | 6         |
| <b>B Dataset and data structure</b>                                | <b>7</b>  |
| <b>C Descriptive statistics</b>                                    | <b>12</b> |
| <b>D Regression models</b>                                         | <b>14</b> |
| <b>E Additional analyses</b>                                       | <b>15</b> |

## A. Coding approach for group appeals

This coding instruction is a guide to coding group appeals in election manifestos. Put simply, we examine the statements made by parties in election manifestos with regard to the mention of social groups. The relevant election manifestos (1990–2019) are processed in Excel files, which contain the coding for group objects, group categories, and group predicates in addition to the grammatical sentences, statements, issues and actor coding. The correct coding of the additional group variables is explained below.

### A.1. Definition of group appeals

Parties explain their political goals and demands in their election manifestos in a comprehensive manner. This includes concrete political contents and measures (policies), but also the mention of social groups or a combination of both. To be able to record whether specific social groups are mentioned or addressed in a statement, several additional variables have to be coded into the AUTNES framework for the analysis of election manifestos. The definition of a group appeal is based on Thau (2019, 65):

*“[...] group-based appeals [are defined] as explicit statements that link a political party to some category of people. They consist of three parts: (1) some political party (2) is associated or dissociated (3) with some group.”*

According to this definition, group appeals basically consist of three elements: (1) a political party or political actor, (2) a positive or negative association, and (3) a social group. The coding thus works quite similarly to the AUTNES issue coding of election programs. That is, a subject (usually a political party) talks about an object (a particular social group), and the relationship between the two can be positive, negative, or neutral (predicate).

**Table A.1:** Coding of group appeals

|   |          |                                                      |
|---|----------|------------------------------------------------------|
| 1 | subject  | Who is speaking?                                     |
| 2 | object   | Which group is being addressed?                      |
| 3 | relation | What is the relationship between subject and object? |

### A.2. Assignment of group appeals to individual statements

Ideally, group appeals should not be identified directly in the statements but by carefully reading the grammatical sentences in the original election manifesto. This should include marking each sentence in which a social group is mentioned. However, to incorporate the corresponding variables into the AUTNES coding structure, it is necessary to code them at the statement level. Therefore, the exact statements that cover the social groups in terms of content are coded accordingly. Thus, it may happen that one part of the statements in a sentence is coded as a group appeal, but the other part is not.

“Austria needs a new form of agriculture because the costs of surplus production for farmers, taxpayers, and consumers have long since exceeded the limits of what is bearable” (SPÖ 1990, 23).

Based on the rules of statement formation (see AUNTES coding instructions for election manifestos), the four following statements were formed:

- SPÖ for new form of agriculture
- SPÖ against costs of surplus production for farmers
- SPÖ against costs of surplus production for taxpayers
- SPÖ against costs of surplus production for consumers

Accordingly, the first statement does not contain a group appeal, while the second, third, and fourth statements were coded as a positive appeals toward farmers, taxpayers, and consumers, respectively.

### A.3. Special coding rules

Special attention must be paid to the following points when coding group appeals:

- General supportive statements  
A positive predicate is coded for all wordings that indicate a positive stance of the party toward a specific target group—without further detailing the specific policy measure. “We stand on the side of women.”, “We support employees.”, “The middle class can rely on us.” are coded with a positive relation (+1).
- Effects of election promises  
Parties often promise certain policy measures that mainly or exclusively affect certain social groups, but without explicitly mentioning the group in question. In such cases, no group appeal is coded.  
*We want to abolish tuition fees. (SPÖ 2008: 13)*  
*We demand a significant increase in the care allowance [...]. (SPÖ 2008: 21)*
- Mentions of two groups in one statement  
In principle, exactly one social group is coded per statement. This becomes problematic if two social groups are mentioned in one statement. In most cases, however, this only happens if two groups are treated equally or if the benefits for different groups are equalized. In this case, one of the two groups mentioned always benefits, and only this group is then recorded in the coding.  
*We Greens want equality between women and men in the labor market. (Greens 2006: 12)*  
Coding: +1 women
- Hidden mentions of social groups  
In some cases, social groups are not mentioned explicitly but are “hidden” in other phrases such as adjectives or compound nouns. In such cases, a group appeal is also coded.  
*Farmer income levels must be fair and just (SPÖ 2008: 27).*  
Coding: +1 farmers

- Deterioration of the status quo

If a party calls for measures that, if introduced, would lead to a deterioration for a specific group compared to the status quo, a negative predicate is coded.

*Care in old age for all and millionaires are finally allowed to make their contribution. (SPÖ 2017: 10)*

Coding: -1 millionaires

- Sentence references

Parties often mention a social group or promise a measure for a certain group and refer to it in the next sentence—for example with the phrases “this” / “that” / “they” / “those”. In this case, a group appeal is coded for the corresponding statements both in the statement of the original sentence and in the doubled statements, which were formed based on the AUTNES unitizing rules.

*Physicians are the supporting pillars of the healthcare system. They need better working conditions and fair pay (Team Stronach 2013: 13).*

According to the AUTNES unitizing rules, the sentence is decomposed into the following statements:

*Team Stronach for physicians*

Coding: +1 Doctors

*Team Stronach for supporting pillars of the healthcare system*

*Team Stronach for physicians*

Coding: +1 physicians

*Team Stronach for better working conditions for physicians*

Coding: +1 physicians

*Team Stronach for fair pay for physicians*

Coding: +1 physicians

#### A.4. Examples

- *We want to eliminate the burden of boarding school costs for apprentices. (SPÖ 2008: 15)*  
Coding groups: +1 apprentices
- *The long-term unemployed should receive a job guarantee, also to ensure good pensions in old age. (SPÖ 2019: 95)*  
Coding groups: +1 long-term unemployed
- *For women who leave the workforce to raise children, special training programs should be offered to make it easier for them to return to work. (ÖVP 1990: 24)*  
Coding groups: +1 women
- *Hardly any other profession is as important to our society as our teachers. (ÖVP 2019: 30)*  
Coding groups: +1 teachers
- *Our social system has to take special account of the needs of senior citizens. (FPÖ 2008: 7)*  
Coding groups: + senior citizens
- *Families are the most important factor for the functioning of a community. (FPÖ 2017: 16)*  
Coding groups: + families
- *Rainbow families must not be disadvantaged in Austria. (Greens 2019: 51)*  
Coding groups: +1 rainbow families
- *There are still many gaps in social insurance for artists. (Greens 2019: 75)*  
Coding groups: +1 artists

## B. Dataset and data structure

**Table B.1:** Assignment of issues

|             |                                                                                                                |
|-------------|----------------------------------------------------------------------------------------------------------------|
| Economy     | economy (general), market / liberalisation / deregulation, globalisation, financial sector / banks, businesses |
| Education   | education general, education in kindergarten, school, university and college, vocational training              |
| Employment  | job market / unemployment, employment protection, salaries / wages / earnings                                  |
| Europe      | EU (general), treaties / steps of integration / Euro, enlargement, participation / democracy, policies         |
| Health      | health care system, health care spending, health insurance, rights / duties of individuals                     |
| Housing     | rent / housing costs, rent control, public housing, housing benefits                                           |
| Immigration | immigration general, asylum, integration, citizenship                                                          |
| Pensions    | pension system, pension increases, pension funding, retirement age                                             |
| Security    | combating crime, criminal prosecution, penal system, crime prevention                                          |
| Taxes       | taxes (general), taxes for individuals, taxes for businesses                                                   |

**Table B.2:** Assignment of groups

|             |                                                                                                                                                                                             |
|-------------|---------------------------------------------------------------------------------------------------------------------------------------------------------------------------------------------|
| Economy     | entrepreneurs, employers, founders, self-employed, investors                                                                                                                                |
| Education   | teachers, pupils, students, educators, instructors, apprentices, graduates, school leavers, professors, academics                                                                           |
| Employment  | workers, employees, wage earners, professionals, job-seekers, unemployed people, unemployment benefit recipients, people out of work                                                        |
| Europe      | EU citizens, EU politicians, EU officials, EU bureaucrats, EU foreigners                                                                                                                    |
| Health      | patients, sick people, injured people, addicts, doctors, health personnel, nurses, midwives, therapists                                                                                     |
| Housing     | tenants, landlords, property owners, apartment seekers                                                                                                                                      |
| Immigration | immigrants, migrants, foreigners, refugees, asylum seekers, migrant workers, third-country citizens, persecuted people                                                                      |
| Pensions    | pensioners, senior citizens, retirees, recipients of minimum pensions, elderly people                                                                                                       |
| Security    | criminals, perpetrators, sex offenders, child abusers, prisoners, drug dealers, terrorists, Islamists, extremists, crime victims, police officers, law enforcement officials, investigators |
| Taxes       | taxpayers, taxable persons, tax evaders                                                                                                                                                     |



**Table B.3:** Data structure: Issue and group coding

| Sentence                                                                                                                                                                                                                  | Group object            | Group category | Issue category |
|---------------------------------------------------------------------------------------------------------------------------------------------------------------------------------------------------------------------------|-------------------------|----------------|----------------|
| With the employment guarantee, we want to offer every older unemployed person a job paid according to the collective agreement after one year of unemployment at the latest. (SPÖ 2017: 28)                               | unemployed people       | employment     | employment     |
| In order to support students, we want to reintroduce student housing subsidies to create more affordable living space. (SPÖ 2019: 138)                                                                                    | students                | education      | housing        |
| Clear rules for immigration: The Austrian economy needs foreign workers. (ÖVP 1999: 48)                                                                                                                                   | foreign workers         | immigration    | economy        |
| Pensioners in particular are suffering from inflation and rising prices. (ÖVP 2008: 12)                                                                                                                                   | pensioners              | pensions       | economy        |
| Criminal asylum seekers are deported immediately and without the possibility of appeal. (FPÖ 2006: 4)                                                                                                                     | criminal asylum seekers | security       | immigration    |
| Employment permits for foreigners are only to be issued for a limited period of time and only if there is an acute shortage of labor in the relevant profession that cannot be remedied in the medium term. (FPÖ 2006: 2) | foreigners              | immigration    | employment     |
| People who are addicted to drugs need help, not prosecution. (Greens 2013: 100)                                                                                                                                           | drug addicts            | health         | security       |
| More educational opportunities are needed to make the transition to the working world of tomorrow easier for employees. (Greens 2019: 46)                                                                                 | employees               | employment     | education      |

**Table B.4:** Issues, question wording, and covered elections in public opinion data

| Issue       | Survey | Question wording                                                          | Elections    |
|-------------|--------|---------------------------------------------------------------------------|--------------|
| Economy     | GfK    | Promoting economic upturn                                                 | 1990 – 1995  |
|             | GfK    | Promoting economic upturn. Strengthening Austria as location for business | 1999 – 2002  |
|             | GfK    | Securing economic growth                                                  | 2006 – 2008  |
|             | ICCP   | Promoting economic growth                                                 | 2017         |
| Education   | GfK    | Improving the education system                                            | 1990 – 1999  |
|             | GfK    | Improving and modernizing the school and education systems                | 2002         |
|             | GfK    | Improving and modernizing the school and education system                 | 2006 – 2008  |
|             | Market | Education reform                                                          | 2013         |
|             | ICCP   | Introducing comprehensive schools                                         | 2017         |
| Employment  | GfK    | Fighting unemployment                                                     | 1990         |
|             | GfK    | Protecting and creating jobs                                              | 1994 – 2002  |
|             | GfK    | Securing and creating jobs                                                | 2006 – 2008  |
|             | Market | New jobs                                                                  | 2013         |
|             | ICCP   | Fighting unemployment                                                     | 2017         |
| Europe      | GfK    | Ensuring a rapid joining to the EC                                        | 1990         |
|             | GfK    | Representing Austria’s interests in the EU                                | 1994 – 2002  |
| Health      | GfK    | Improving the hospital and health care system                             | 1990 to 1995 |
|             | GfK    | Ensuring good medical care for all Austrians                              | 2002         |
|             | GfK    | Securing decent medical care for all Austrians                            | 2006 – 2008  |
|             | Market | Health reform                                                             | 2013         |
| Housing     | GfK    | Creating more affordable housing                                          | 2006 - 2008  |
|             | Market | Affordable housing                                                        | 2013         |
|             | ICCP   | Creating affordable housing                                               | 2017         |
| Immigration | GfK    | Coming to grips with the question of ‘foreigners’                         | 1990         |
|             | GfK    | Coming to grips with the ‘foreigners’ question                            | 1994 – 2002  |
|             | GfK    | Coming to grips with the ‘foreigners’ problem                             | 2006 – 2008  |
|             | Market | Immigration                                                               | 2013         |
|             | ICCP   | Controlling immigration                                                   | 2017         |
| Pensions    | GfK    | Securing the pensions                                                     | 1990 – 1999  |
|             | GfK    | Securing the present pensions                                             | 2002         |
|             | GfK    | Securing pensions                                                         | 2006 – 2008  |
|             | Market | Pensions                                                                  | 2013         |
|             | ICCP   | Fighting poverty in old age                                               | 2017         |
| Security    | GfK    | Providing for law and order                                               | 1990         |
|             | GfK    | Fighting crime                                                            | 1994 – 1999  |
|             | GfK    | Providing for law and order and less crime                                | 2002         |
|             | GfK    | Promoting domestic security and less crime                                | 2006 – 2008  |
|             | Market | Terrorism                                                                 | 2013         |
|             | ICCP   | Protecting Austria from terrorism                                         | 2017         |
|             | GfK    | Reducing taxes                                                            | 1990         |

*Continued on next page*

Taxes

Table B.4 – *Continued from previous page*

| <b>Issue</b> | <b>Survey</b> | <b>Question wording</b>                                                 | <b>Elections</b> |
|--------------|---------------|-------------------------------------------------------------------------|------------------|
|              | GfK           | Reducing the tax burden                                                 | 1994 – 1999      |
|              | GfK           | Accomplishing a fair taxation system,<br>cutting back on taxes and dues | 2002             |
|              | GfK           | Tax reform, cutting taxes and contributions                             | 2006 – 2008      |
|              | Market        | Cutting taxes                                                           | 2013             |

## C. Descriptive statistics

Table C.1: Summary statistics

|                                  | Mean | SD   | Min  | Max  | N   |
|----------------------------------|------|------|------|------|-----|
| Share of group appeals           | 0.19 | 0.15 | 0    | 1    | 400 |
| Share of related group appeals   | 0.09 | 0.12 | 0    | 1    | 400 |
| Share of unrelated group appeals | 0.04 | 0.08 | 0    | 1    | 400 |
| Issue competence                 | 0.08 | 0.05 | 0    | 0.45 | 400 |
| Issue salience                   | 0.09 | 0.04 | 0.02 | 0.21 | 400 |
| Systemic salience                | 0.08 | 0.06 | 0.02 | 0.31 | 400 |

Fig. C.1: Average shares of party-issue-group combinations

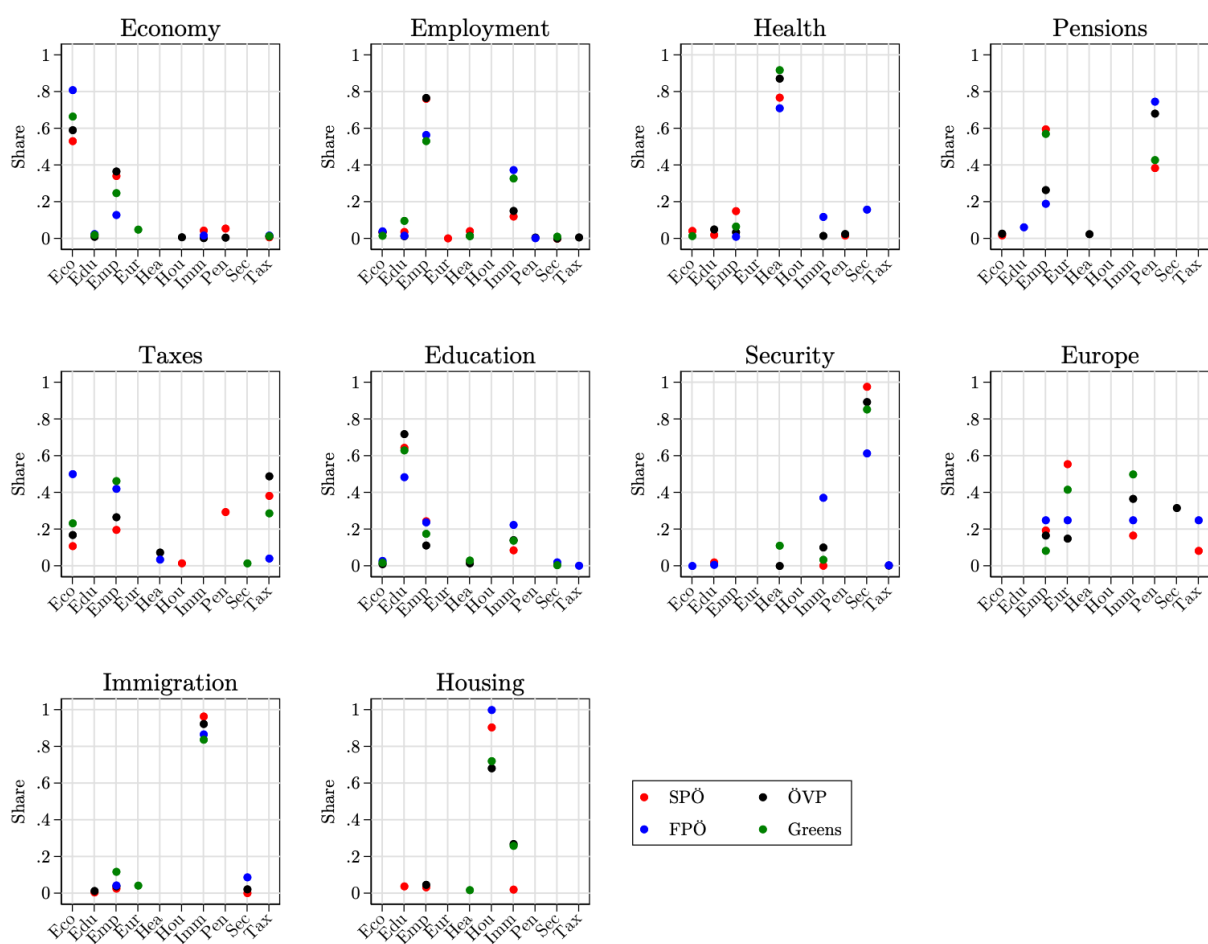

Notes: The y-axis shows the average share of party-issue-group combinations on a given issue. The x-axis denotes groups.

**Fig. C.2:** Average shares of group appeals across issues, parties and elections

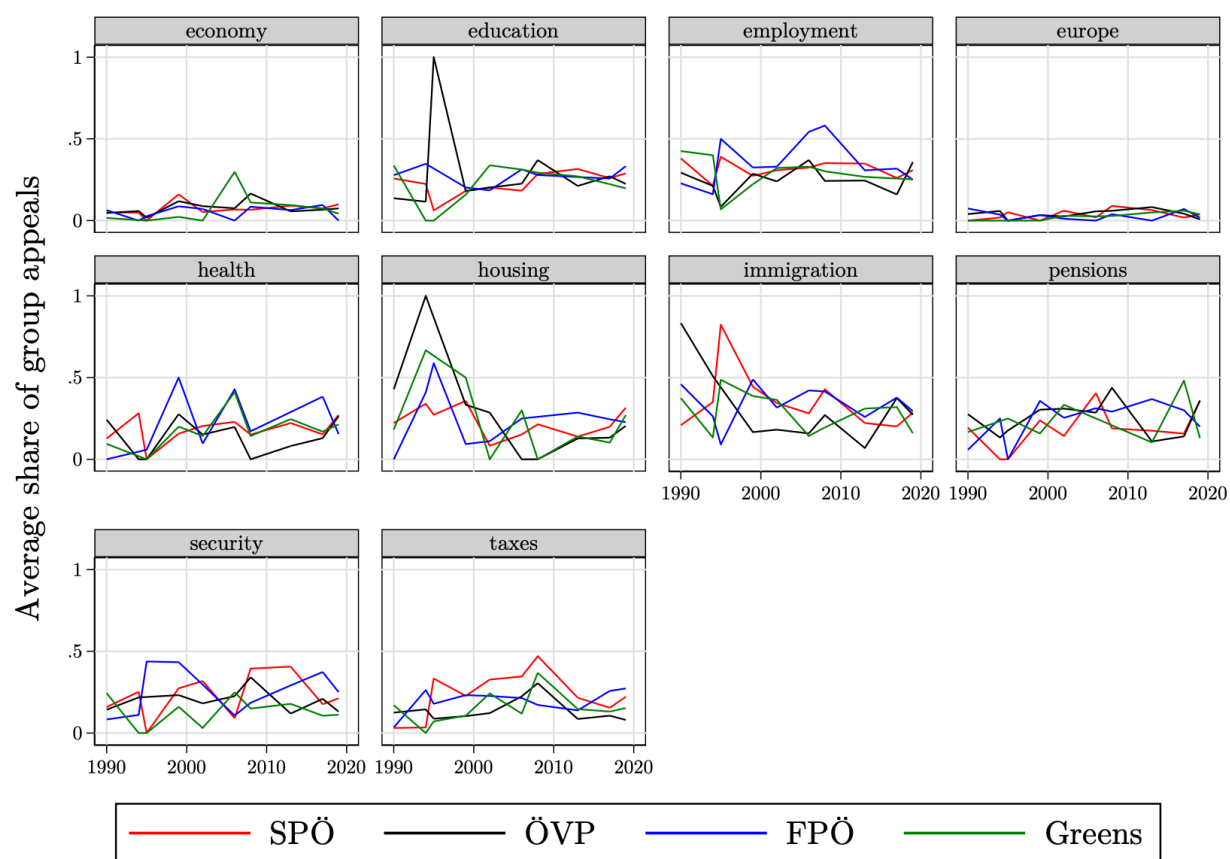

Notes: The y-axis shows the share of group appeals on a given issue across elections for each party.

## D. Regression models

**Table D.1:** Effect of issue competence and voter salience

|                        | Model 1  |        | Model 2  |        | Model 3  |        |
|------------------------|----------|--------|----------|--------|----------|--------|
| Issue competence       | 1.39***  | (0.38) |          |        | 1.24***  | (0.39) |
| Voter salience         |          |        | 3.28***  | (0.46) | 3.57***  | (0.47) |
| Systemic salience      |          |        |          |        | -1.06*** | (0.35) |
| Constant               | -0.96*** | (0.12) | -1.08*** | (0.11) | -1.13*** | (0.13) |
| Party fixed effects    | Yes      |        | Yes      |        | Yes      |        |
| Election fixed effects | Yes      |        | Yes      |        | Yes      |        |
| Observations           | 400.00   |        | 400.00   |        | 400.00   |        |
| Log likelihood         | -195.89  |        | -194.58  |        | -193.84  |        |

Note: Robust standard errors in parentheses.

\*  $p < 0.1$ , \*\*  $p < 0.05$ , \*\*\*  $p < 0.01$

**Table D.2:** Effect of issue competence and voter salience

|                                          | Model 1<br>(all groups) |        | Model 2<br>(related groups) |         | Model 3<br>(unrelated groups) |         |
|------------------------------------------|-------------------------|--------|-----------------------------|---------|-------------------------------|---------|
| Issue competence                         | 4.04***                 | (1.03) | 3.74***                     | (1.27)  | 4.45***                       | (1.47)  |
| Voter salience                           | 5.87***                 | (0.81) | 4.63***                     | (1.18)  | 5.84***                       | (1.29)  |
| Issue competence $\times$ Voter salience | -30.91***               | (9.99) | -16.57                      | (13.01) | -42.88***                     | (15.30) |
| Systemic salience                        | -1.06***                | (0.36) | -1.67***                    | (0.48)  | 1.00                          | (0.85)  |
| Constant                                 | -1.33***                | (0.14) | -1.59***                    | (0.15)  | -2.49***                      | (0.21)  |
| Party fixed effects                      | Yes                     |        | Yes                         |         | Yes                           |         |
| Election fixed effects                   | Yes                     |        | Yes                         |         | Yes                           |         |
| Observations                             | 400.00                  |        | 400.00                      |         | 400.00                        |         |
| Log likelihood                           | -193.54                 |        | -113.48                     |         | -58.69                        |         |

Note: Robust standard errors in parentheses.

\*  $p < 0.1$ , \*\*  $p < 0.05$ , \*\*\*  $p < 0.01$

## E. Additional analyses

**Table E.1:** Effect of issue competence and voter salience

|                        | Model 1<br>(all groups) |        | Model 2<br>(related groups) |        | Model 3<br>(unrelated groups) |        |
|------------------------|-------------------------|--------|-----------------------------|--------|-------------------------------|--------|
| Issue competence       | 1.24***                 | (0.39) | 2.22***                     | (0.48) | 0.46                          | (0.42) |
| Voter salience         | 3.57***                 | (0.47) | 3.33***                     | (0.65) | 2.77***                       | (0.81) |
| Systemic salience      | -1.06***                | (0.35) | -1.67***                    | (0.47) | 1.00                          | (0.85) |
| Constant               | -1.13***                | (0.13) | -1.47***                    | (0.13) | -2.21***                      | (0.16) |
| Party fixed effects    | Yes                     |        | Yes                         |        | Yes                           |        |
| Election fixed effects | Yes                     |        | Yes                         |        | Yes                           |        |
| Observations           | 400.00                  |        | 400.00                      |        | 400.00                        |        |
| Log likelihood         | -193.84                 |        | -113.54                     |        | -58.89                        |        |

Note: Robust standard errors in parentheses.

\*  $p < 0.1$ , \*\*  $p < 0.05$ , \*\*\*  $p < 0.01$

Table E.1 presents the results for the three fractional probit regression models for all groups (Model 1), related groups (Model 2), and unrelated groups (Model 3). In Model 2 and Figure E.1, there are highly statistically significant and positive effects for both issue salience and issue competence.

However, Model 3 and E.2 indicate that the effect of issue salience only applies to appeals to unrelated groups. In contrast, there is no statistically significant effect of issue competence.

**Fig. E.1:** Predicted share of appeals to related groups at different levels of issue salience and issue competence

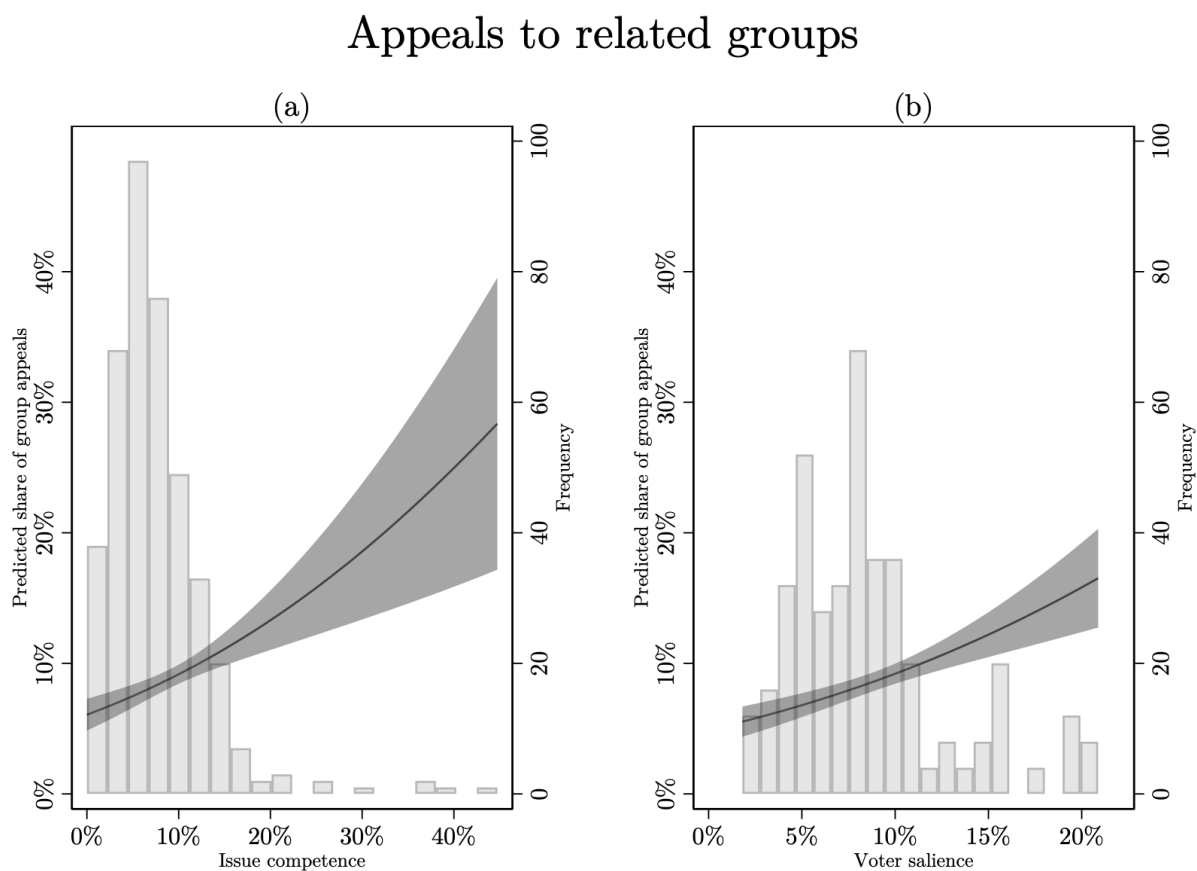

Notes: Results based on Model 2 in Table A.9. Shaded areas indicate 95% confidence intervals. Bars display variable distributions.

## References

Thau, Mads. 2019. How Political Parties Use Group-Based Appeals: Evidence from Britain 1964–2015. *Political Studies*, **67**(1), 63–82.



**Fig. E.2:** Predicted share of appeals to unrelated groups at different levels of issue salience and issue competence

### Appeals to unrelated groups

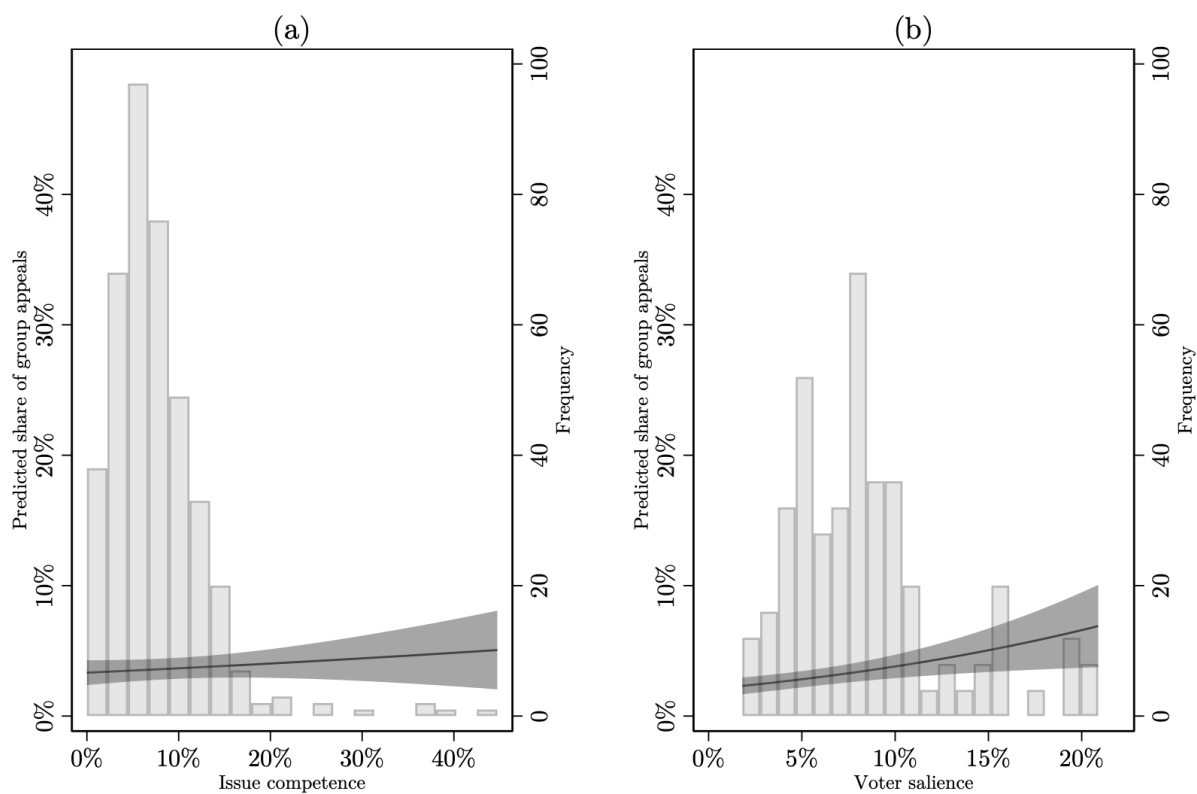

Notes: Results based on Model 3 in Table A.9. Shaded areas indicate 95% confidence intervals. Bars display variable distributions.
